# Supplementary material for: Multi-omics insights into potential mechanism of SGLT2 inhibitors cardiovascular benefit in diabetic cardiomyopathy
Source: Front Cardiovasc Med. 2022 Oct 5;9:999254. doi: 10.3389/fcvm.2022.999254 (PMC9579694; doi:10.3389/fcvm.2022.999254)
Supplement: Supplementary file 4 [file Table_4.XLSX]

## Sheet: 1
N300 代谢组物质列表 The detailed detect list of N300
No.	Compound	中文名	HMDB
1	2,3-Diaminopropionic acid	2,3-二氨基丙酸	HMDB0002006
2	5-Hydroxylysine	5-羟基赖氨酸	HMDB0000450
3	Lysine	赖氨酸	HMDB0000182
4	Histidine	组氨酸	HMDB0000177
5	Arginine	精氨酸	HMDB0000517
6	Ornithine	鸟氨酸	HMDB0000214
7	Glutamine	谷氨酰胺	HMDB0000641
8	Glutamic acid	谷氨酸	HMDB0000148
9	Cystine	胱氨酸	HMDB0000192
10	Sarcosine	肌氨酸	HMDB0000271
11	Beta-Alanine	β-丙氨酸	HMDB0000056
12	Alanine	丙氨酸	HMDB0000161
13	Dimethylglycine	二甲基甘氨酸	HMDB0000092
14	Gamma-Aminobutyric acid	γ-氨基丁酸	HMDB0000112
15	Serine	丝氨酸	HMDB0000187
16	Threonine	苏氨酸	HMDB0000167
17	Homoserine	高丝氨酸	HMDB0000719
18	Creatine	肌酸	HMDB0000064
19	Glycylproline	甘胺脯氨酸	HMDB0000721
20	Homocitrulline	高瓜氨酸	HMDB0000679
21	Methylcysteine	半胱氨酸甲酯	HMDB0002108
22	2-Phenylglycine	2-苯甘氨酸	HMDB0002210
23	Tyrosine	酪氨酸	HMDB0000158
24	3-Chlorotyrosine	3-氯-酪氨酸	HMDB0001885
25	5-Hydroxy-tryptophan	5-羟基-色氨酸	HMDB0000472
26	Asparagine	天冬酰胺	HMDB0000168
27	Phenylalanine	苯丙氨酸	HMDB0000159
28	Leucyl-Glycine	亮氨酰甘胺酸	HMDB0028929
29	Kynurenine	犬尿氨酸	HMDB0000684
30	3-Nitrotyrosine	3- 硝基酪氨酸	HMDB0001904
31	Aspartic acid	天冬氨酸	HMDB0000191
32	Aminoadipic acid	氨基己二酸	HMDB0000510
33	N-Acetyalanine	N-乙酰丙氨酸	HMDB0000766
34	N-Acetyaspartic acid	N-乙酰天冬氨酸	HMDB0000812
35	N-Acetytyrosine	N-乙酰酪氨酸	HMDB0000866
36	N-Acetyltryptophan	N-乙酰色氨酸	HMDB0013713
37	N-Phenylacetylphenylalanine	N-苯乙酰苯丙氨酸	HMDB0002372
38	Glycine	甘氨酸	HMDB0000123
39	Guanidoacetic acid	乙酸胍	HMDB0000128
40	Citrulline	瓜氨酸	HMDB0000904
41	3-Aminoisobutanoic acid	3-氨基丁酸	HMDB0003911
42	Proline	脯氨酸	HMDB0000162
43	Acetylglycine	乙酰甘氨酸	HMDB0000532
44	Pipecolic acid	哌啶酸	HMDB0000716
45	N-Acetylserine	乙酰丝氨酸	HMDB0002931
46	N-Acetylglutamine	乙酰谷酰胺	HMDB0006029
47	Valine	缬氨酸	HMDB0000883
48	Pyroglutamic acid	焦谷氨酸	HMDB0000267
49	5-Aminolevulinic acid	5-氨基酮戊酸	HMDB0001149
50	Methionine	蛋氨酸	HMDB0000696
51	Isoleucine	异亮氨酸	HMDB0000172
52	Leucine	亮氨酸	HMDB0000687
53	Norleucine	正亮氨酸	HMDB0001645
54	Tryptophan	色氨酸	HMDB0000929
55	Phenylacetylglutamine	苯乙酰谷氨酰胺	HMDB0006344
56	Thyronine	甲状腺原氨酸	HMDB0000667
57	Norvaline	戊氨酸	HMDB0013716
58	N-Acetyl-L-methionine	乙酰甲硫氨酸	HMDB0011745
59	N-Acetylhistidine	乙酰组氨酸	HMDB0032055
60	1-Methylhistidine	甲基组氨酸	HMDB0000001
61	4-Hydroxyproline	4-羟脯氨酸	HMDB0000725
62	3,5-Diiodothyronine	3,5-二碘甲腺原氨酸	HMDB0000582
63	Glutamyalanine	谷胺酰丙氨酸	HMDB0003764
	Tauro-a-muricholic acid and	牛磺-α-鼠胆酸/	NA/
64	Tauro-b-muricholic acid	牛磺-β-鼠胆酸	HMDB0000932
65	Taurohyocholate	牛磺猪胆酸	HMDB0011637
66	Tauroursodeoxycholic acid	牛磺熊脱氧胆酸	HMDB0000874
67	Taurohyodeoxycholic acid	牛磺猪脱氧胆酸	NA
68	Taurocholic acid	牛磺胆酸	HMDB0000036
69	Taurodeoxycholic acid	牛磺去氧胆酸	HMDB0000896
70	Taurochenodeoxycholic acid	牛磺鹅去氧胆酸	HMDB0000951
71	7-Dehydrocholic acid	7-脱氢胆酸	NA
72	3-Oxocholic acid	3-氧胆酸	HMDB0000502
73	3a,6a,7b-Trihydroxy-5b-cholanoic acid	ω-鼠胆酸	HMDB0000364
74	Alpha-muricholic acid	α-鼠胆酸	HMDB0000506
75	Glycohyocholic acid	甘氨猪胆酸	NA
76	Glycoursodeoxycholic acid	甘氨酸熊去氧胆酸	HMDB0000708
77	Lithocholyltaurine	牛磺石胆酸	HMDB0000722
78	Isohyodeoxycholic acid	异猪去氧胆酸	HMDB0000664
79	Ursodeoxycholic acid	熊去氧胆酸	HMDB0000946
80	Hyodeoxycholic acid	猪去氧胆酸	HMDB0000733
81	Hyocholic acid	猪胆酸	HMDB0000760
82	Cholic acid	胆酸	HMDB0000619
83	Glycocholic acid	甘胆酸	HMDB0000138
84	isolithocholic acid	异石胆酸	HMDB0000717
85	Chenodeoxycholic acid	鹅去氧胆酸	HMDB0000518
86	Chenodeoxycholic acid glycine conjugate	甘氨鹅去氧胆酸	HMDB0000637
87	Deoxycholic acid glycine conjugate	甘氨去氧胆酸	HMDB0000631
88	Lithocholic acid	石胆酸	HMDB0000761
89	Beta-Deoxycholic acid	β-脱氧胆酸	HMDB0000438
90	Deoxycholic acid	脱氧胆酸	HMDB0000626
91	Lithocholic acid glycine conjugate	甘氨石胆酸	HMDB0000698
92	Sulfolithocholylglycine	甘氨石胆酸硫酸盐	HMDB0002639
93	isodeoxycholic acid	异脱氧胆酸	HMDB0002536
94	Sulfolithocholic acid	石胆酸硫酸盐	HMDB0000907
95	Norcholic acid	正胆酸	NA
96	Nordeoxycholic acid	去甲脱氧胆酸	NA
97	Nutriacholic acid	7-酮石胆酸	HMDB0000467
98	Apocholic acid	原胆酸	NA
99	3a,6b,7b-Trihydroxy-5b-cholanoic acid	β-鼠胆酸	HMDB0000415
100	Isoursodeoxycholic acid	异熊去氧胆酸	HMDB0000686
101	12-Dehydrocholic acid	12-脱氢胆酸	NA
102	6-Ketolithocholic acid	6-酮石胆酸	NA
103	12-Ketolithocholic acid	12-酮石胆酸	HMDB0000328
104	Dehydrolithocholic acid	脱氢石胆酸	NA
105	Isoallolithocholic acid	异别石胆酸	HMDB0000713
106	Taurodehydrocholic acid	牛磺酸脱氢胆酸	NA
107	7,12-diketoLCA	7,12-二酮石胆酸	NA
108	6,7-diketoLCA	6,7-二酮石胆酸	NA
109	UDCA-7s	熊去氧胆酸-7-硫酸	NA
110	DCA-3s	去氧胆酸-3-硫酸	HMDB0002504
111	GDCA-3s	甘氨去氧胆酸-3-硫酸	NA
112	GCDCA-3s	甘氨鹅去氧胆酸-3-硫酸	NA
113	Tauro-w-muricholic acid	牛磺-ω-鼠胆酸	NA
114	Glycohyodeoxycholic acid	甘氨猪去氧胆酸	NA
115	Ursocholic acid	熊胆酸	HMDB0000917
116	Acetic acid	乙酸	HMDB0000042
117	Propionic acid	丙酸	HMDB0000237
118	Butyric acid	丁酸	HMDB0000039
119	Isobutyric acid	异丁酸	HMDB0001873
120	Isovaleric acid	异戊酸	HMDB0000718
121	Valeric acid	戊酸	HMDB0000892
122	(±)-2-Methylpentanoic acid	2-甲基戊酸	HMDB0031580
123	3-Methylpentanoic acid	3-甲基戊酸	HMDB0033774
124	Isocaproic acid	异己酸	HMDB0000689
125	Caproic acid	己酸	HMDB0000535
126	Carnitine	肉碱	HMDB0000062
127	Acetylcarnitine	乙酰肉碱	HMDB0000201
128	Propionylcarnitine	丙酰肉碱	HMDB0000824
129	Malonylcarnitine	丙二酰肉碱	HMDB0002095
130	Butyrylcarnitine	丁酰肉碱	HMDB0002013
131	2-Methylbutyroylcarnitine	2-甲基丁酰肉碱	HMDB0000378
132	Valerylcarnitine	戊酰肉碱	HMDB0013128
133	Isovalerylcarnitine	异戊酰肉碱	HMDB0000688
134	3-Hydroxylisovalerylcarnitine	3-羟基异戊酰肉碱	HMDB0061189
135	Glutarylcarnitine	戊二酰肉碱	HMDB0013130
136	Hexanoylcarnitine	己酰肉碱	HMDB0000756
137	Adipoylcarnitine	己二酰基肉碱	HMDB0061677
138	Octanoylcarnitine	辛酰基肉碱	HMDB0000791
139	Decanoylcarnitine	癸酰基肉碱	HMDB0000651
140	Dodecanoylcarnitine	十二酰基肉碱	HMDB0002250
141	Tetradecanoylcarnitine	十四酰基肉碱	HMDB0005066
142	Palmitoylcarnitine	十六酰基肉碱	HMDB0000222
143	Oleylcarnitine	油烯基肉碱	HMDB0005065
144	Linoleylcarnitine	亚油酸肉碱	HMDB0006469
145	Stearylcarnitine	硬脂酰肉碱	HMDB0000848
146	Methylmalonylcarnitine	甲基丙二酰肉碱	HMDB0013133
147	Glucaric acid	葡糖二酸	HMDB0000663
148	Gluconolactone	葡糖酸内酯	HMDB0000150
149	Glyceric acid	甘油酸	HMDB0000139
150	Erythronic acid	三羟丁酸	HMDB0000613
151	Ribonic acid	核糖酸	HMDB0000867
152	N-Acetylneuraminic acid	乙酰神经氨酸	HMDB0000230
153	Melibiose	蜜二糖	HMDB0000048
154	Glucose	葡萄糖	HMDB0000122
155	Lactulose	乳果糖	HMDB0000740
156	D-Maltose and Alpha-Lactose	D-麦芽糖和 α-乳糖	HMDB0000163/HMDB0000186
157	Maltotriose	麦芽三糖	HMDB0001262
158	Xylose	木糖	HMDB0000098
159	Ribulose	核酮糖	HMDB0000621
160	Xylulose	木酮糖	HMDB0001644
161	Rhamnose	鼠李糖	HMDB0000849
162	Beta-D-Fucose	6-脱氧吡喃半乳糖	HMDB0003081
163	Fructose	果糖	HMDB0000660
164	N-Acetyl-D-glucosamine	N-乙酰基-D-葡糖胺	HMDB0000215
165	Glyceraldehyde	甘油醛	HMDB0001051
166	Tartaric acid	酒石酸	HMDB0000956
167	N-Acetylserotonin	N-乙酰羟色胺	HMDB0001238
168	Indole-3-acetamide	吲哚-3-乙酰胺	HMDB0029739
169	Indole-3-methyl acetate	吲哚-3-乙酸甲酯	HMDB0029738
170	Indole-3-carboxylic acid	吲哚-3-羧酸	HMDB0003320
171	Indoleacetic acid	吲哚乙酸	HMDB0000197
172	Indoleacrylic acid	3-吲哚丙烯酸	HMDB0000734
173	Indole-3-propionic acid	吲哚-3-丙酸	HMDB0002302
174	Melatonin	褪黑素	HMDB0001389
175	Indole-3-carboxaldehyde	吲哚-3-甲醛	HMDB0029737
176	Indolelactic acid	吲哚乳酸	HMDB0000671
177	Indole-3-pyruvic acid	吲哚丙酮酸	HMDB0060484
178	Threonic acid	苏糖酸	HMDB0000943
179	Hydroxypropionic acid	羟基丙酸	HMDB0000700
180	Aminocaproic acid	氨基己酸	HMDB0001901
181	Lactic acid	乳酸	HMDB0000190
182	Malic acid	苹果酸	HMDB0000156
183	Fumaric acid	延胡索酸	HMDB0000134
184	Glutaric acid	戊二酸	HMDB0000661
185	Cis-Aconitic acid	顺式乌头酸	HMDB0000072
186	Alpha-ketoisovaleric acid	3-甲基-2-氧代丁酸	HMDB0000019
187	Ketoleucine	酮亮氨酸	HMDB0000695
188	3-Methyl-2-oxovaleric acid	3-甲基-2-氧代戊酸	HMDB0000491
189	Methylmalonic acid	甲基丙二酸	HMDB0000202
190	Galactonic acid	半乳糖酸	HMDB0000565
191	Glycolic acid	乙醇酸	HMDB0000115
192	3-Hydroxybutyric acid	3-羟基丁酸	HMDB0000357
193	alpha-Hydroxyisobutyric acid	α-羟基异丁酸	HMDB0000729
194	2-Hydroxybutyric acid	2-羟基丁酸	HMDB0000008
195	3-Hydroxyisovaleric acid	3-羟基异戊酸	HMDB0000754
196	Glutaconic acid	戊烯二酸	HMDB0000620
197	2-Hydroxy-2-methylbutyric acid	2-羟基-2-甲基丁酸	HMDB0001987
198	Malonic acid	丙二酸	HMDB0000691
199	Oxalic acid	草酸	HMDB0002329
200	Maleic acid	马来酸	HMDB0000176
201	Itaconic acid	衣康酸	HMDB0002092
202	Acetoacetic acid	乙酰乙酸	HMDB0000060
203	Citric acid	柠檬酸	HMDB0000094
204	Isocitric acid	异柠檬酸	HMDB0000193
205	Pyruvic acid	丙酮酸	HMDB0000243
206	Oxoglutaric acid	α-酮戊二酸	HMDB0000208
207	Caprylic acid	辛酸	HMDB0000482
208	Oxoadipic acid	2-氧代己二酸	HMDB0000225
209	Succinic acid	琥珀酸	HMDB0000254
210	Citramalic acid	柠苹酸	HMDB0000426
211	2,2-dimethyladipic acid	2,2-二甲基己二酸	NA
212	2,2-Dimethylsuccinic acid	2,2-二甲基琥珀酸	HMDB0002074
213	D-2-Hydroxyglutaric acid	2-羟基戊二酸	HMDB0000606
214	But-2-enoic acid	2-丁烯酸	HMDB0010720
215	Ethylmethylacetic acid	2-甲基丁酸	HMDB0002176
216	2-Methy4-pentenoic acid	2-甲基-4-戊烯酸	HMDB0031158
217	Azelaic acid	壬二酸	HMDB0000784
218	Sebacic acid	葵二酸	HMDB0000792
219	Citraconic acid	柠康酸	HMDB0000634
220	Methylsuccinic acid	甲基琥珀酸	HMDB0001844
221	Adipic acid	己二酸	HMDB0000448
222	Methylglutaric acid	甲基戊二酸	HMDB0000752
223	Pimelic acid	庚二酸	HMDB0000857
224	3-Methyladipic acid	3-甲基己二酸	HMDB0000555
225	Suberic acid	辛二酸	HMDB0000893
226	4-Methylhexanoic acid	4-甲基己酸	NA
227	Heptanoic acid	庚酸	HMDB0000666
228	Pelargonic acid	壬酸	HMDB0000847
229	Capric acid	癸酸	HMDB0000511
230	Undecylenic acid	十一碳烯酸	HMDB0033724
231	Undecanoic acid	十一烷酸	HMDB0000947
232	5Z-Dodecenoic acid	5-十二碳烯酸	HMDB0000529
233	Dodecanoic acid	月桂酸	HMDB0000638
234	12-Tridecenoic acid	12-十三烯酸	NA
235	Tridecanoic acid	十三酸	HMDB0000910
236	Myristoleic acid	肉豆蔻脑酸	HMDB0002000
237	9E-tetradecenoic acid	反式-十四碳烯酸	HMDB0062248
238	Ricinoleic acid	蓖麻油酸	HMDB0034297
239	12-hydroxystearic acid	12-羟基硬脂酸	HMDB0061706
240	Myristic acid	肉豆蔻酸	HMDB0000806
241	9-Pentadecenoic acid	9-十五碳烯酸	HMDB0029765
242	Pentadecanoic acid	十五酸	HMDB0000826
243	Palmitoleic acid	9-十六碳烯酸	HMDB0003229
244	Palmitelaidic acid	棕榈反油酸	HMDB0012328
245	10Z-Heptadecenoic acid	顺式-10-十七碳烯酸	HMDB0060038
246	10-Trans-Heptadecenoic acid	反式-10-十七碳烯酸	NA
247	Alpha-Linolenic acid	α-亚麻酸	HMDB0001388
248	Gamma-Linolenic acid	γ -亚麻酸	HMDB0003073
249	Linoleic acid	亚油酸	HMDB0000673
250	Linoelaidic acid	反式亚麻酸	HMDB0006270
251	10,13 Nonadecadienoic Acid	顺式-10,13-十九碳二烯酸	NA
252	Eicosapentaenoic acid EPA	二十碳五烯酸	HMDB0001999
253	Arachidonic acid	花生四烯酸	HMDB0001043
254	Dihomo-gamma-linolenic acid	8,11,14-二十碳三烯酸	HMDB0002925
255	Docosahexaenoic acid DHA	二十二碳六烯酸	HMDB0002183
256	Docosapentaenoic acid (22n-3)	二十二碳五烯酸(22n-3)	HMDB0006528
257	Docosapentaenoic acid (22n-6)	二十二碳五烯酸 (22n-6)	HMDB0001976
258	Adrenic acid	二十二碳四烯酸	HMDB0002226
259	Palmitic acid	棕榈酸	HMDB0000220
260	Heptadecanoic acid	十七酸	HMDB0002259
261	Oleic acid	油酸	HMDB0000207
262	Petroselinic acid	顺 6-十八碳烯酸	HMDB0002080
263	Stearic acid	硬脂酸	HMDB0000827
264	10Z-Nonadecenoic acid	十九碳烯酸	HMDB0013622
265	15-HEDE	15-羟二十烷二烯酸	NA
266	2-Hydroxy-3-methylbutyric acid	2-羟基-3-甲基丁酸	HMDB0000407
267	2-Hydroxycaproic acid	2-羟基己酸	HMDB0001624
268	2-Methylhexanoic acid	2-甲基己酸	HMDB0031594
269	15-HETE	15-羟二十烷四烯酸	HMDB0003876
270	Shikimic acid	莽草酸	HMDB0003070
271	Quinic acid	金鸡纳酸	HMDB0003072
272	Fructose 6-phosphate	6-磷酸果糖	HMDB0000124
273	D-Ribose 5-phosphate	5-磷酸核糖	HMDB0001548
274	Glucose 6-phosphate	6-磷酸葡萄糖	HMDB0001401
275	S-Adenosylhomocysteine	腺苷高半胱氨酸	HMDB0000939
276	3,4-Dihydroxyhydrocinnamic acid	3,4-二羟基苯丙酸	HMDB0000423
277	Hydroxyphenyllactic acid	4-羟苯乳酸	HMDB0000755
278	2-Hydroxycinnamic acid	2-羟基肉桂酸	HMDB0002641
279	Coumaric acid and 4-Hydroxycinnamic acid	香豆酸和 4-羟基肉桂酸	HMDB0041592/HM DB0002035
280	Cinnamic acid	肉桂酸	HMDB0000567
281	2-Phenylpropionate	2-苯基丙酸	HMDB0011743
282	Hydrocinnamic acid	氢化肉桂酸	HMDB0000764
283	3-(3-Hydroxyphenyl)-3-hydroxypropanoic acid	3-(3-羟基苯基)-3-羟基丙酸	HMDB0002643
284	Phenyllactic acid	苯乳酸	HMDB0000779
285	3-Phenylbutyric acid	3-苯基丁酸	HMDB0001955
286	m-Aminobenzoic acid	间氨基苯甲酸	HMDB0001891
287	Gallic acid	没食子酸	HMDB0005807
288	Protocatechuic acid	原儿茶酸	HMDB0001856
289	3-Hydroxyhippuric acid	3-羟基马尿酸	HMDB0006116
290	4-Hydroxyhippuric acid	4-羟基马尿酸	HMDB0013678
291	4-Hydroxybenzoic acid	4-羟基苯甲酸	HMDB0000500
292	Ortho-Hydroxyphenylacetic acid	正-羟基苯乙酸	HMDB0000669
293	Hippuric acid	马尿酸	HMDB0000714
294	Benzoic acid	苯甲酸	HMDB0001870
295	Phenylacetic acid	苯乙酸	HMDB0000209
296	Salicyluric acid	水杨尿酸	HMDB0000840
297	Benzenebutanoic acid	苯丁酸	HMDB0000543
298	4-Hydroxyphenylpyruvic acid	4-羟苯基丙酮酸	HMDB0000707
299	Phenylpyruvic acid	苯丙酮酸	HMDB0000205
300	3,4-Dihydroxymandelic acid	3,4-二羟苯乙酸	HMDB0001866
301	4-Aminohippuric acid	对氨基马尿酸	HMDB0001867
302	p-Hydroxymandelic acid	对羟基扁桃酸	HMDB0000822
303	Homovanillic acid	高香草酸	HMDB0000118
304	p-Hydroxyphenylacetic acid	对羟基苯乙酸	HMDB0000020
305	3-Aminosalicylic acid	3-氨基水杨酸	HMDB0001972
306	3-Hydroxyanthranilic acid	3-羟基邻氨基苯甲酸	HMDB0001476
307	Mandelic acid	扁桃酸	HMDB0000703
308	Vanillic acid	香草酸	HMDB0000484
309	Phthalic acid	邻苯二甲酸	HMDB0002107
310	3-Hydroxyphenylacetic acid	3-羟基苯乙酸	HMDB0000440
311	3-Pyridylacetic acid	3-吡啶乙酸	HMDB0001538
312	Nicotinic acid	烟酸	HMDB0001488
313	Picolinic acid	吡啶甲酸	HMDB0002243
314	N-Methylnicotinamide	N-甲基烟酰胺	HMDB0003152
315	Adenosine monophosphate	一磷酸腺苷	HMDB0000045
316	Guanosine monophosphate	一磷酸鸟苷	HMDB0001397
317	Anserine	鹅肌肽	HMDB0000194
318	Carnosine	肌肽	HMDB0000033
319	Imidazolepropionic acid	咪唑丙酸	HMDB0002271
320	Pyrrole-2-carboxylic acid	吡咯-2-羧酸	HMDB0004230
321	2-Furoic acid	2-糠酸	HMDB0000617
